# Supplementary material
Source: publisher figshare collection journal article supplement (https://acs.figshare.com/ndownloader/files/3763774)
Supplement: Supplementary file 1 [file 3763774]

## Supporting Information

### Mechanism of Inactivation of GABA Aminotransferase by (*E*)- and (*Z*)-(1*S*,3*S*)-3-Amino-4-fluoromethylenyl-1-cyclopentanoic Acid

Hyunbeom Lee,<sup>#,†</sup> Hoang V. Le,<sup>#,†</sup> Rui Wu,<sup>§</sup> Emma Doud,<sup>‡</sup> Ruslan Sanishvili,<sup>||</sup> John F. Kellie,<sup>‡</sup> Phillip D. Compton,<sup>‡</sup> Boobalan Pachaiyappan,<sup>†</sup> Dali Liu,<sup>§</sup> Neil L. Kelleher,<sup>‡</sup> Richard B. Silverman<sup>\*,†</sup>

<sup>†</sup> Departments of Chemistry and Molecular Biosciences, Chemistry of Life Processes Institute, and the Center for Molecular Innovation and Drug Discovery, Northwestern University, Evanston, IL 60208

<sup>§</sup> Department of Chemistry and Biochemistry, Loyola University Chicago, Chicago, IL 60660

<sup>‡</sup> Departments of Chemistry and Molecular Biosciences, and the Proteomics Center of Excellence, Northwestern University, Evanston, IL 60208

<sup>||</sup> X-ray Science Division, Advanced Photon Source, Argonne National Laboratory, Lemont, IL 60439

| Content                                                                             | Pages  |
|-------------------------------------------------------------------------------------|--------|
| <b>Figures S1-S2.</b> Glutamic acid formation after GABA-AT inactivation            | S2     |
| <b>Figures S3-S4.</b> Fluoride ion release during GABA-AT inactivation              | S3     |
| <b>Figure S5.</b> Cofactor release using [ <sup>3</sup> H]PLP-reconstituted GABA-AT | S4     |
| <b>Figures S6-S8.</b> Mass spectral data                                            | S5-S6  |
| <b>Figure S9.</b> UV absorption spectra of control experiments                      | S7     |
| <b>Figures S10-S14.</b> Crystallographic structures                                 | S7-S10 |
| <b>Figures S15-S16.</b> GOLD predicted poses                                        | S11    |
| <b>Table S1.</b> Crystallographic Data Collection and Refinement Statistics         | S12    |

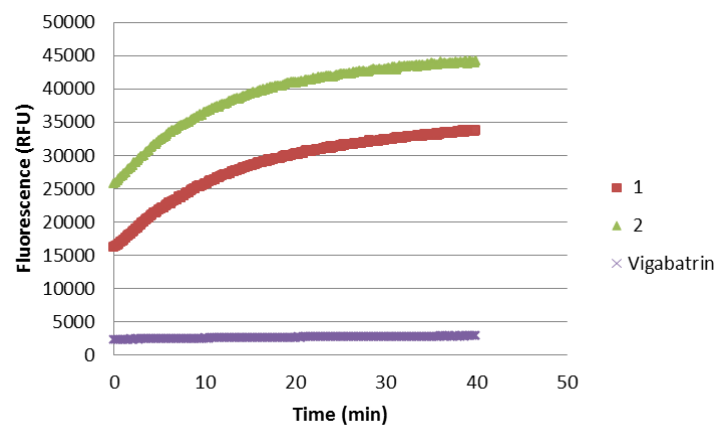

**Figure S1.** Glutamic acid formation after pre-incubation of GABA-AT with **1**, **2**, and vigabatrin (control) for 5 min

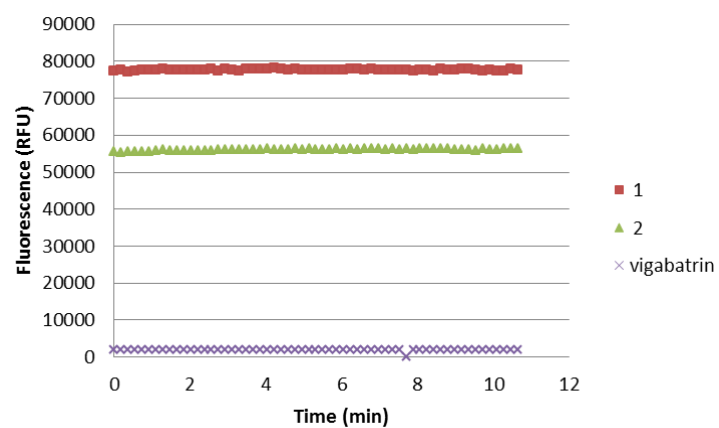

**Figure S2.** Glutamic acid formation after inactivation of GABA-AT with **1**, **2**, and vigabatrin (control) for 24 h

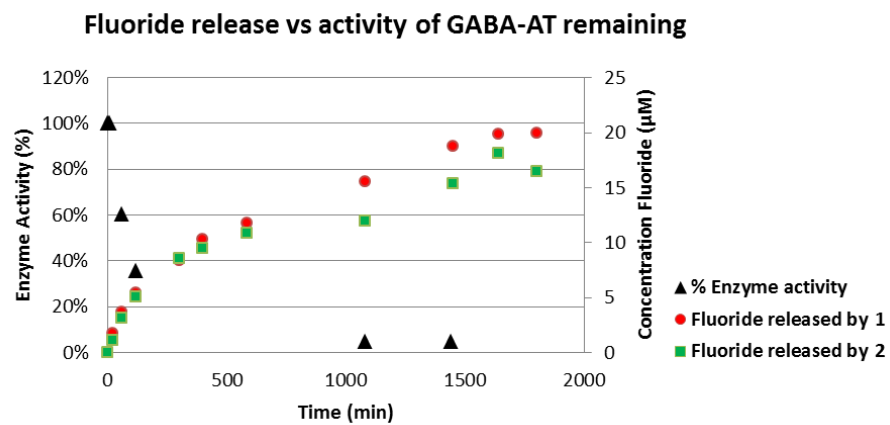

**Figure S3.** Fluoride ion release and measurement of GABA-AT activity by 2 mM **1** and **2**

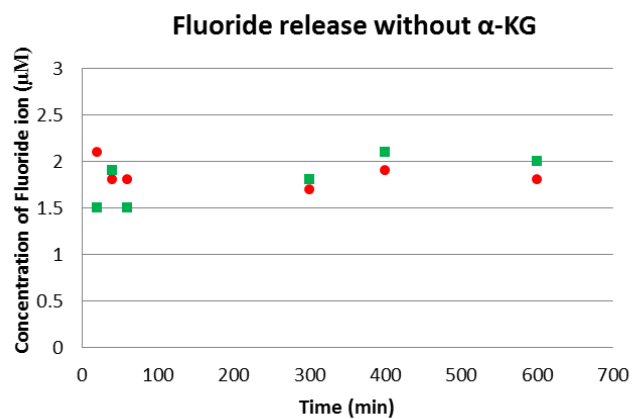

**Figure S4.** Fluoride ion release from **1** and **2** in the absence of  $\alpha$ -ketoglutarate

**A**

**Reversed Phase HPLC and Radioactivity (no inactivator)**

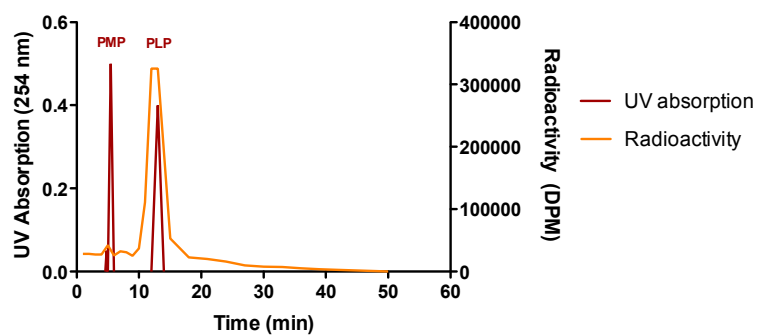

**B**

**Reversed Phase HPLC and Radioactivity (GABA Control)**

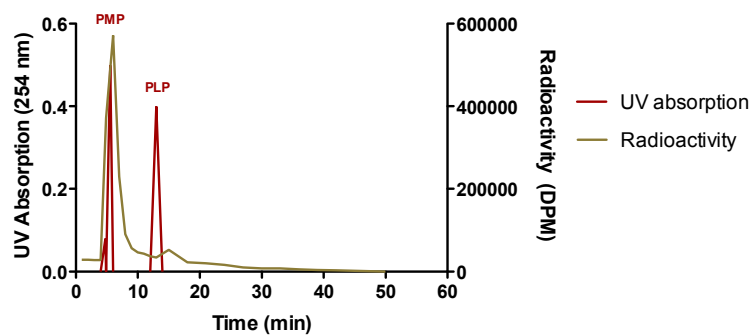

**Figure S5. (A)** Negative control run with the same concentrations of each reagent, excluding inactivator **(B)** Positive control run with 40 mM GABA containing no inactivator or  $\alpha$ -ketoglutarate

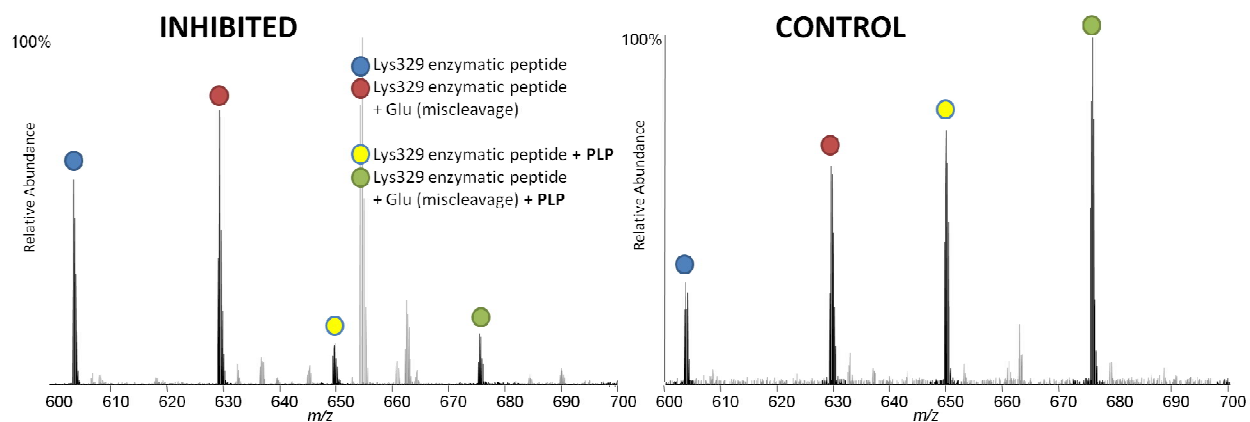

**Figure S6.** Peptide of the inactivated GABA-AT with **1** and a control. The samples were reduced with  $\text{NaBH}_4$  before treating with protease. Blue indicates the peptide, red is a peptide with an extra glutamate residue (because of the missed cleavage), yellow is the peptide plus PLP, and green is the peptide with an extra glutamate residue plus PLP.

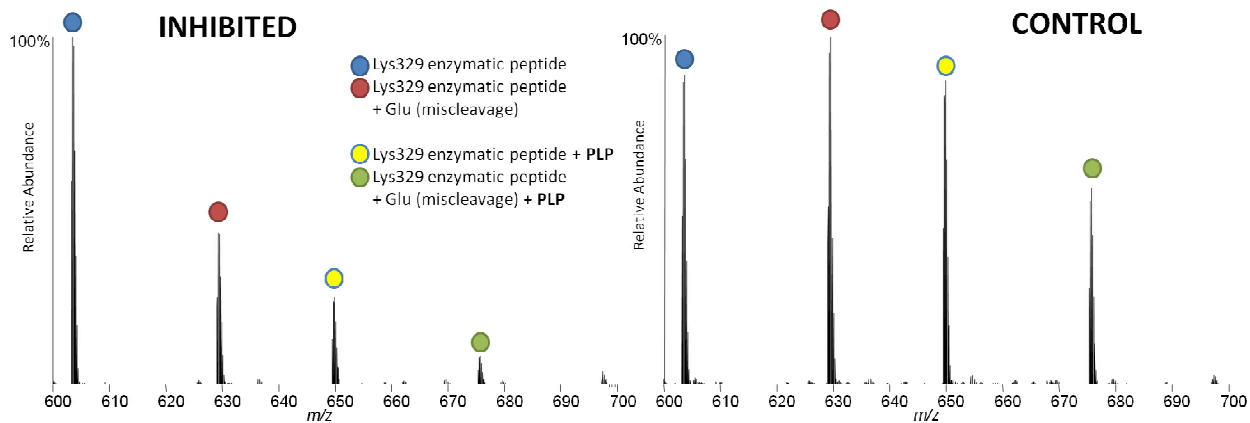

**Figure S7.** Peptide of the inactivated GABA-AT with **2** and a control. The samples were reduced with  $\text{NaBH}_4$  before treating with protease. Blue indicates the peptide, red is a peptide with an extra glutamate residue (because of the missed cleavage), yellow is the peptide plus PLP, and green is the peptide with an extra glutamate residue plus PLP.

**A**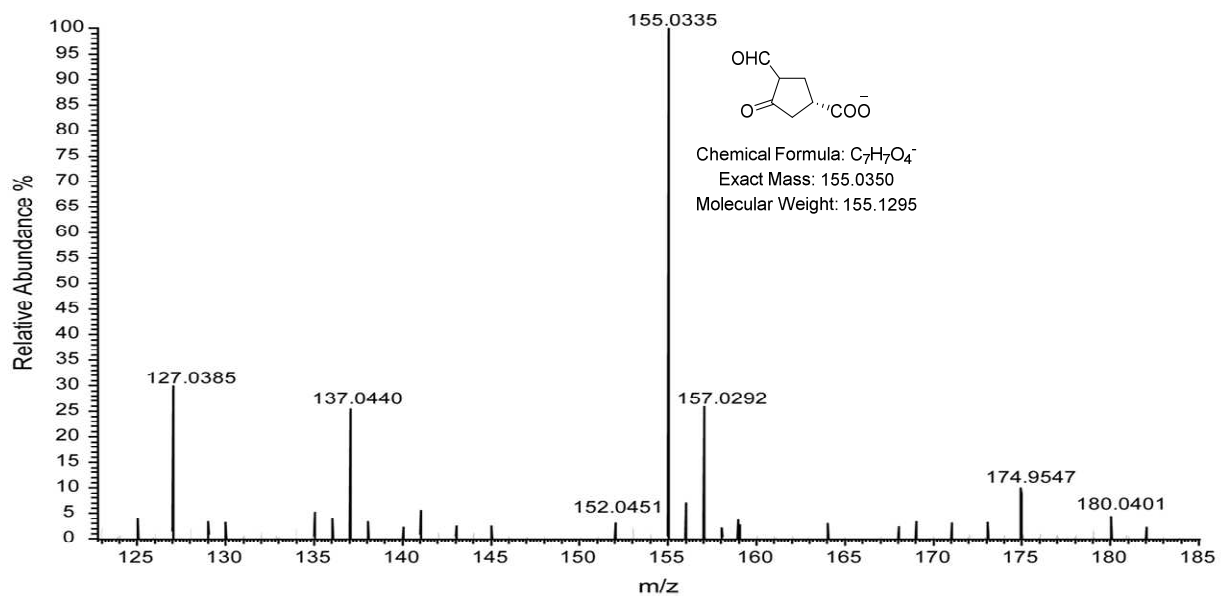**B**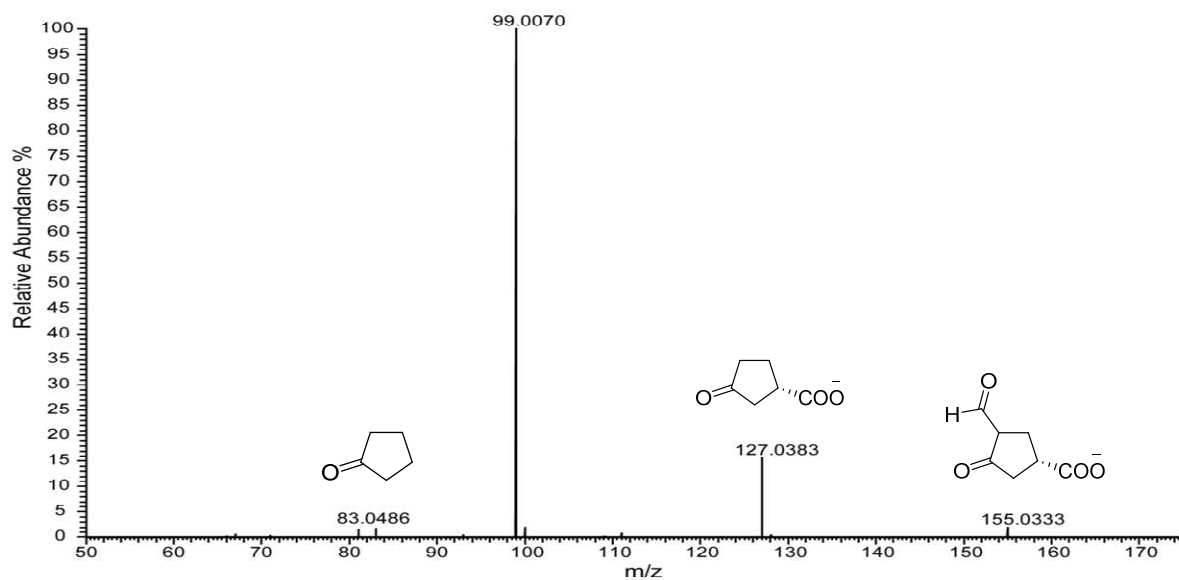

**Figure S8.** (A) High resolution mass spectrum of metabolite released from a reaction incubation of **2** and GABA-AT. (B) Fragmentation and assigned structures of peak  $m/z$  155 from a reaction incubation of **2** and GABA-AT.

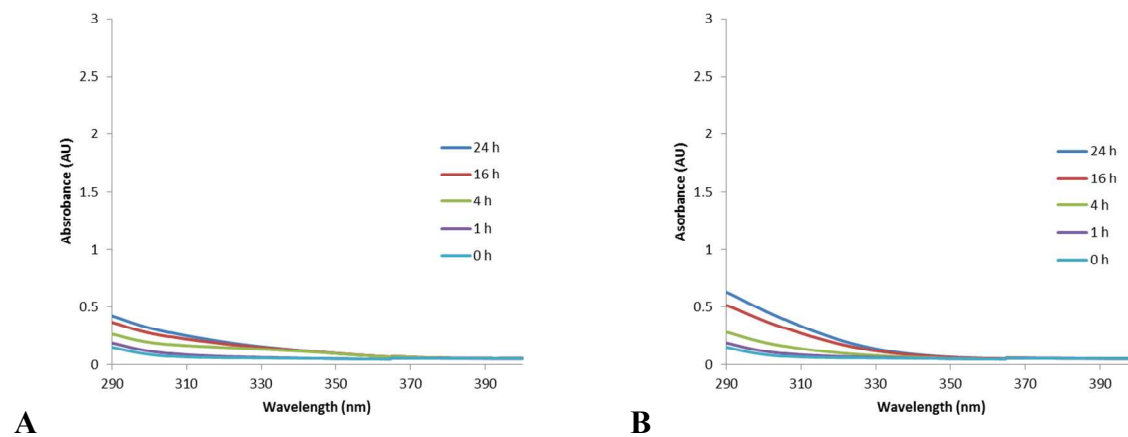

**Figure S9.** UV absorption spectra of control experiments: (A) GABA-AT and GABA and  $\alpha$ -ketoglutarate overtime, (B) GABA-AT and GABA and no  $\alpha$ -ketoglutarate overtime.

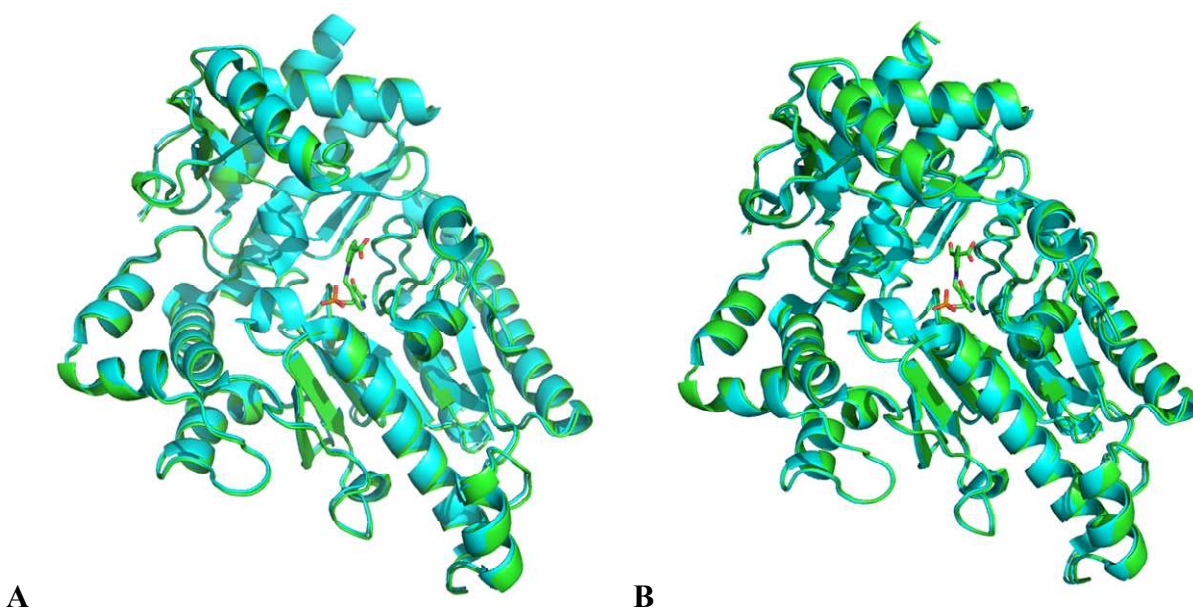

**Figure S10.** A) Ribbon diagram of the superimposed native GABA-AT (cyan) and 1-inactivated GABA-AT (green). B) Ribbon diagram of the superimposed native GABA-AT (cyan) and 2-inactivated GABA-AT (green)

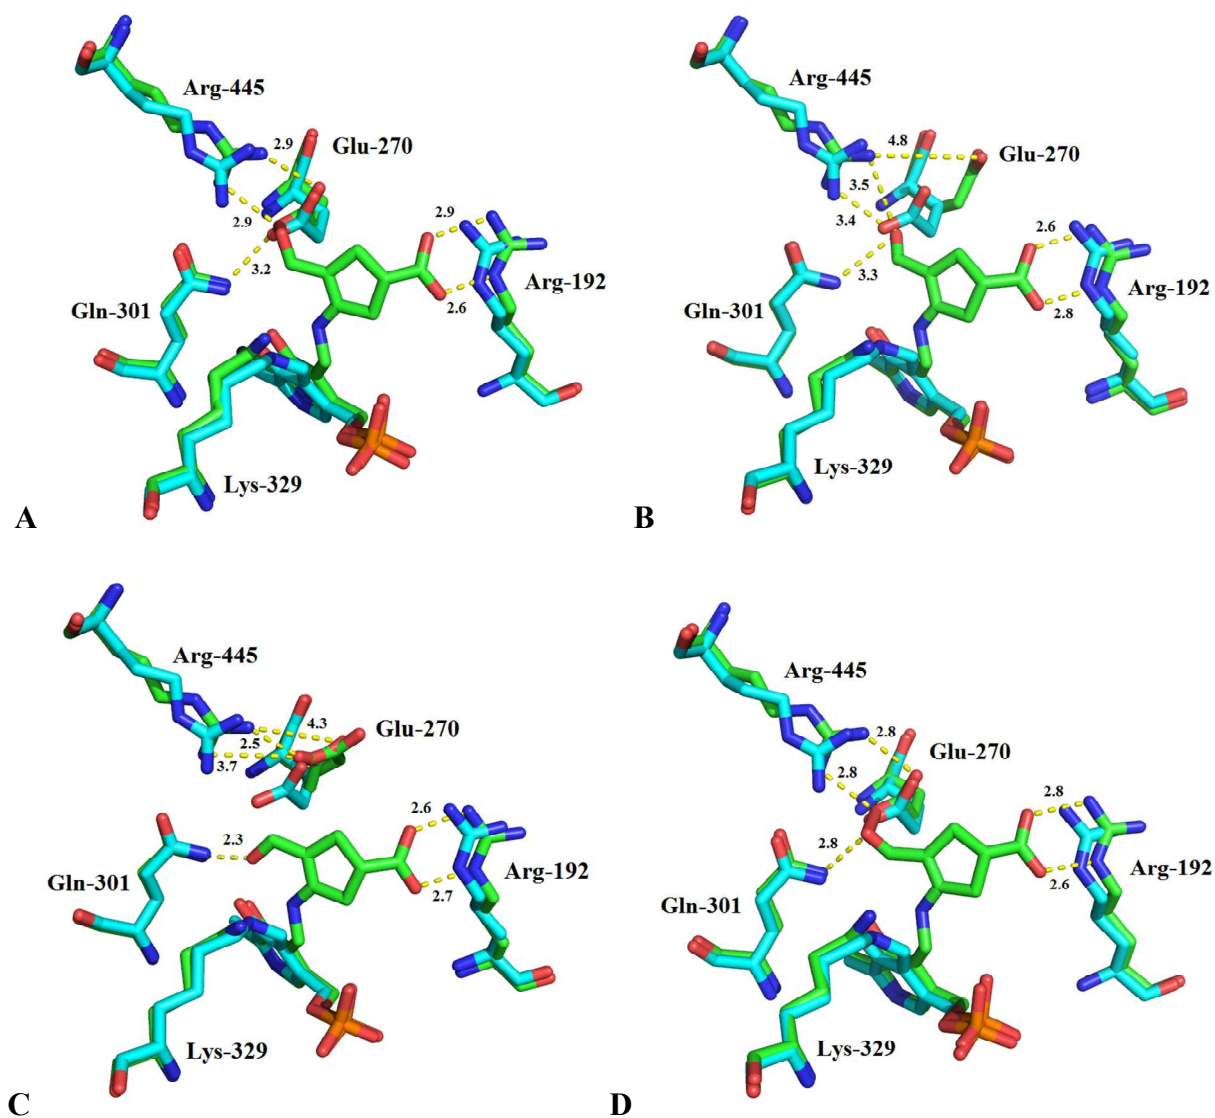

**Figure S11.** Superimposition of the crystal structures of four **2**-inactivated GABA-AT (green) and native GABA-AT (cyan) monomers.



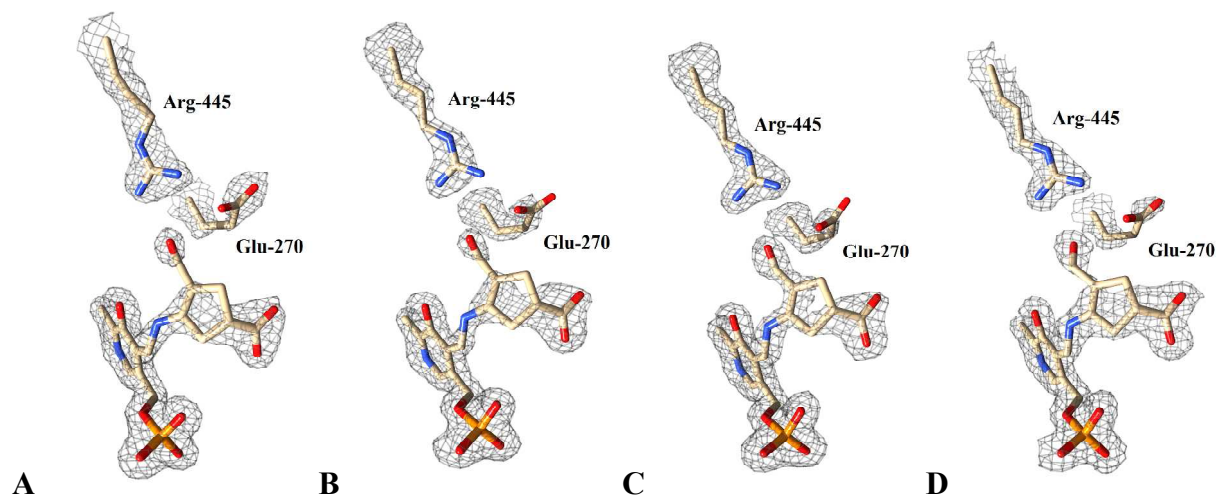

**Figure S12** Stereoview of four **1**-inactivated GABA-AT monomers. The  $2F_o - F_c$  electron-density map is shown as light gray mesh at  $1.0\sigma$  level.

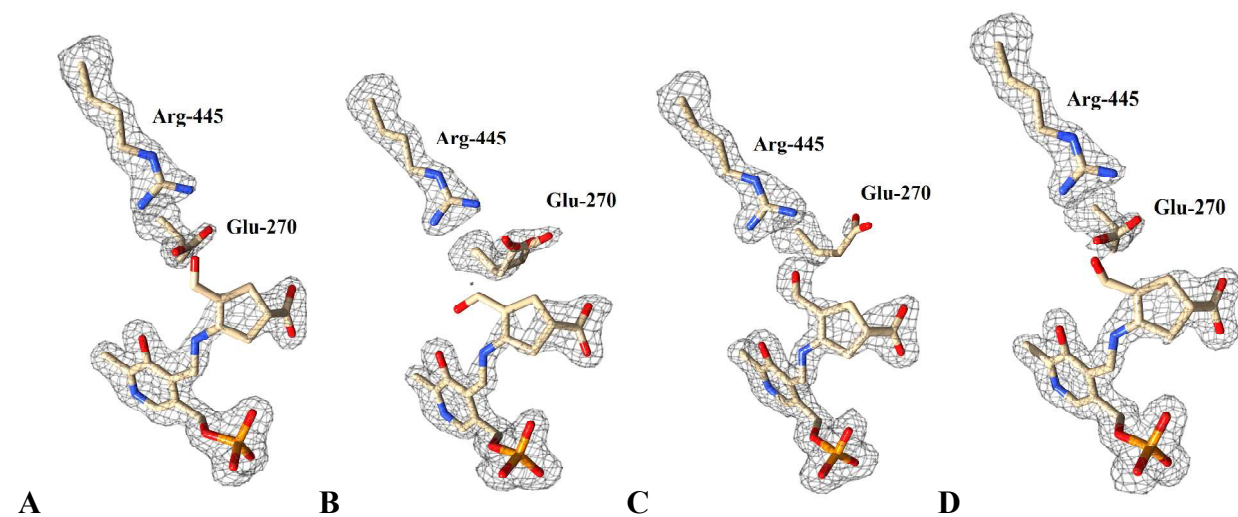

**Figure S13.** Stereoview of four **2**-inactivated GABA-AT monomers. The  $2F_o - F_c$  electron-density map is shown as light gray mesh at  $1.0\sigma$  level. The occupancies for atoms in the aldehyde group in monomers A, B, and C were set to 0 because the aldehyde groups of the adducts clashed with the carboxylate of the Glu-270. The side chain of Glu-270 in monomer B is modeled in two alternate conformations.

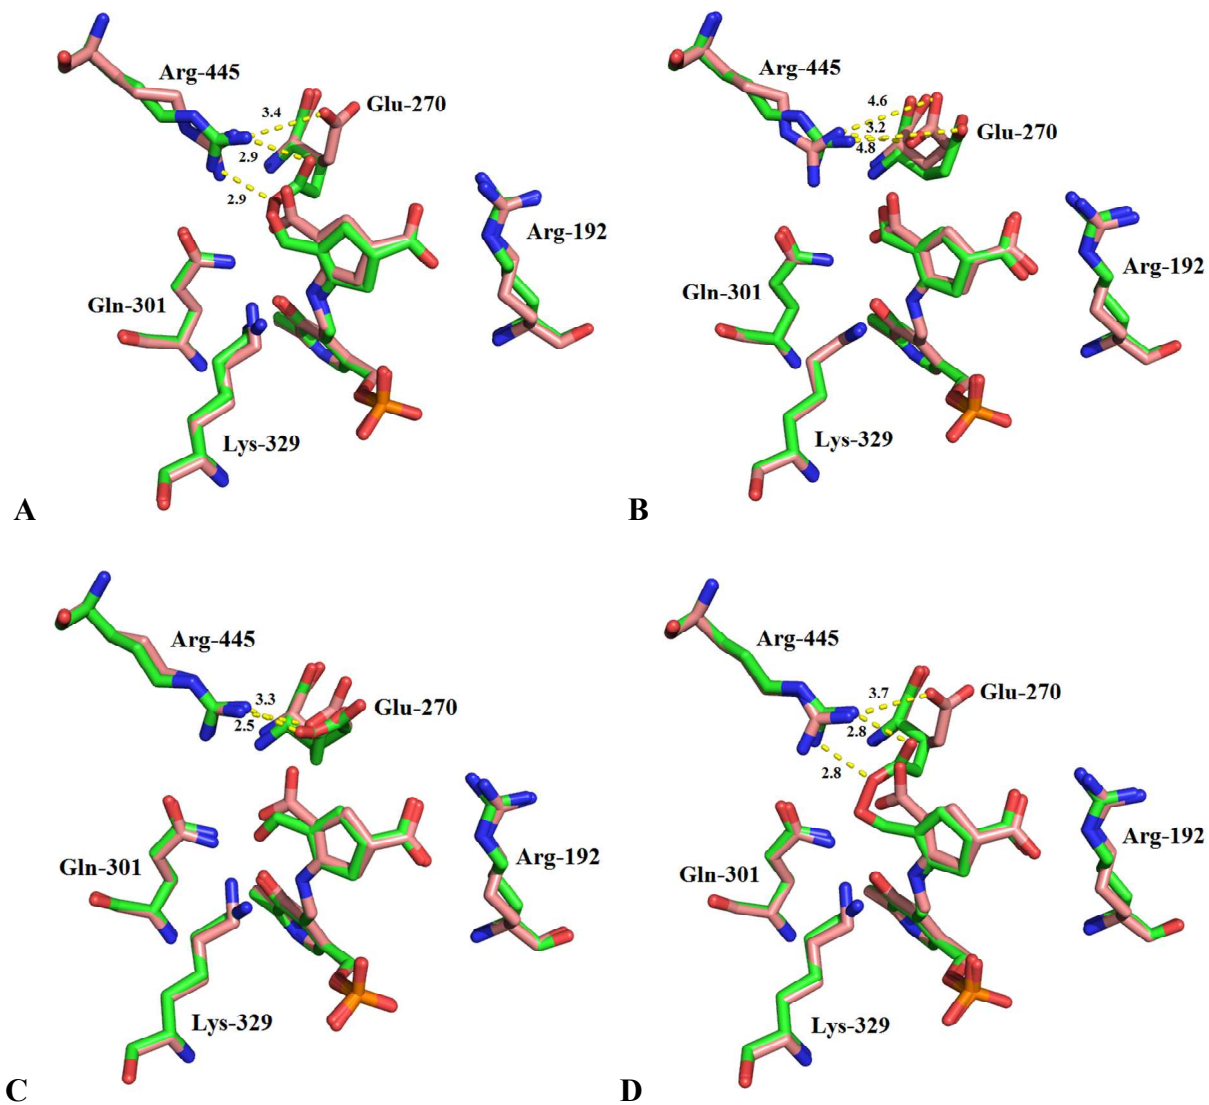

**Figure S14.** Superimposition of the crystal structures of four 2-inactivated GABA-AT (green) and CPP-115-inactivated GABA-AT (pink) monomers.

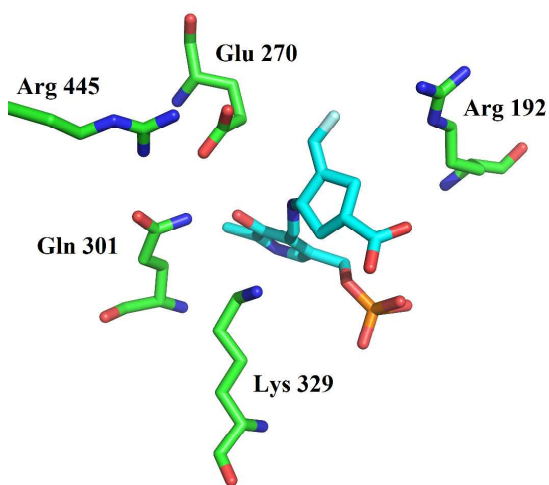

**Figure S15.** GOLD predicted pose of (*E*)-**5** (Scheme S1) in the GABA-AT active site that preserves the Arg445 – Glu270 salt bridge. Only selected residues are shown in green. Note that the orientation of the  $\gamma$ -carboxylic acid is away from Arg192.

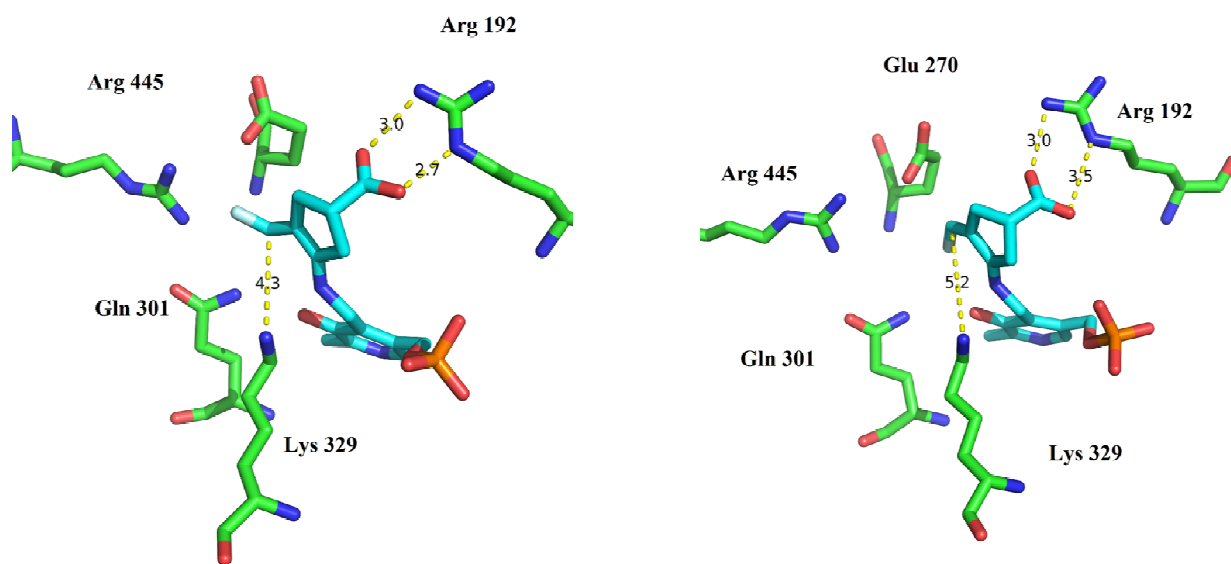

**Figure S16.** GOLD predicted pose of **6-E-isomer** (left) and **6-Z-isomer** (right). The ligands are colored in cyan, whereas the enzyme is colored in green. The distance between Lys 329 and the electrophilic center, as well as the H-bonding with Arg 192 is shown in yellow lines.

**Table S1.** Crystallographic Data Collection and Refinement Statistics

| Data set                                                             | GABA-AT inactivated by 1 | GABA-AT inactivated by 2 |
|----------------------------------------------------------------------|--------------------------|--------------------------|
| PDB code                                                             | xxxx                     | yyyy                     |
| Space Group                                                          | P2 <sub>1</sub>          | P2 <sub>1</sub>          |
| Cell Dimensions                                                      |                          |                          |
| a (Å)                                                                | 69.6                     | 69.6                     |
| b (Å)                                                                | 227.6                    | 227.2                    |
| c (Å)                                                                | 71.3                     | 71.3                     |
| $\alpha = \gamma$ (°)                                                | 90                       | 90                       |
| $\beta$ (°)                                                          | 109.0                    | 108.8                    |
| Resolution (Å)                                                       | 50.00-1.70               | 50.00-1.70               |
| <sup>a</sup> R <sub>merge</sub> (%)                                  | 4.0 (70.6)               | 6.8(84.3)                |
| I/sigma                                                              | 15.5 (1.2)               | 19.7(1.4)                |
| Completeness (%)                                                     | 97.7 (94.7)              | 97.5(95.3)               |
| Redundancy                                                           | 3.0 (2.7)                | 3.2(2.9)                 |
| No. Total reflections                                                | 681840                   | 712557                   |
| No. Unique reflections                                               | 225037                   | 224347                   |
| <sup>b</sup> R <sub>cryst</sub> / <sup>c</sup> R <sub>free</sub> (%) | 15.8/19.5                | 16.4/19.0                |
| No. of Solvent Atoms                                                 | 1787                     | 1842                     |
| No. of Atoms                                                         | 16699                    | 16824                    |
| B-factors (Å <sup>2</sup> )                                          |                          |                          |
| Overall                                                              | 26.6                     | 27.7                     |
| Ligand                                                               | 9.81/48.17               | 13.22/41.38              |
| <sup>d</sup> RMSD Bond Length (Å)                                    | 0.017                    | 0.005                    |
| <sup>d</sup> RMSD Bond Angles (°)                                    | 1.650                    | 1.027                    |
| Ramachandran                                                         |                          |                          |
| Favored (%)                                                          | 96.0                     | 95.9                     |
| Allowed (%)                                                          | 3.70                     | 3.71                     |
| Outlier (%)                                                          | 0.30                     | 0.30                     |

The values for the highest resolution bin are in parentheses.

<sup>a</sup>Linear R<sub>merge</sub> =  $\Sigma |I_{\text{obs}} - I_{\text{avg}}| / \Sigma I_{\text{avg}}$

<sup>b</sup>R<sub>cryst</sub> =  $\Sigma |F_{\text{obs}} - F_{\text{calc}}| / \Sigma F_{\text{obs}}$

<sup>c</sup>Five percent of the reflection data were selected at random as a test set and only these data were used to calculate R<sub>free</sub>
<sup>d</sup>RMSD, root mean square deviation
